# Supplementary material for: Producing hexamethylenediamine from caprolactam via 6-aminocapronitrile: a green production technology of the monomer of nylon-66
Source: Royal Society of Chemistry journal article supplement (doi:10.1039/d4gc02268h), 2024-01-01
Supplement: d4gc02268h1.pdf [file d4gc02268h1.pdf]

## Supporting Information

### Producing hexamethylenediamine from caprolactam via 6-aminocapronitrile: A green production technology of the monomer of Nylon-66

Kaiyu Geng,<sup>a</sup> Hui Li,<sup>a</sup> Dianzi Zhang,<sup>b</sup> Baowei Yu,<sup>b</sup> Hongqin Hu,<sup>b</sup> Jiao Geng\*,<sup>a</sup> Youting Wu\*,<sup>a</sup> Xingbang Hu\*<sup>a</sup>

<sup>a</sup> School of Chemistry and Chemical Engineering, Nanjing University, Nanjing 210023, China.

<sup>b</sup> Shenma Corporation, Pingdingshan 467000, China.

\* Corresponding authors

E-mail: gengjiao@nju.edu.cn, ytwu@nju.edu.cn, huxb@nju.edu.cn

## Chemical reagents

Caprolactam (99%), Raney Ni ( $\text{Ni} \geq 90\%$ ), and vanadium pentoxide (98%) were supplied by Beijing Innochem Technology Co., Ltd. Ethanol (AR), toluene (AR), and barium triphosphate (CP) were supplied by Nanjing reagent Co., Ltd. Alumina (AR), sodium hydroxide (95%), USY zeolite ( $\text{Si}/\text{Al}=20$ ), magnesium phosphate (99%), and calcium metasilicate (AR) were supplied by Shanghai Macklin Biochemical Co., Ltd. Hexadecyl trimethyl ammonium Bromide (99%), adiponitrile (99%), cerium oxide (99.99%), potassium polymetaphosphate (99%), magnesium oxide (99%), and cobalt sesquioxide (AR) were supplied by Meryer Biochemical Technology Co., Ltd. 6-aminocapronitrile (95%), calcium phosphate (98%), zinc phosphate (99%), and aluminium phosphate (99%) were supplied by Bidpharm Technology Co., Ltd. Aluminum tri-sec-butoxide (95%), titanium dioxide (AR), tungsten trioxide (95%), zinc oxide (97%), ferric oxide (99%), niobium pentoxide (99%), and silicon dioxide (99%) were supplied by Tianjin Heowns Biochemical Technology Co., Ltd. HY zeolite ( $\text{Si}/\text{Al}=5$ ), NaY zeolite ( $\text{Si}/\text{Al}=5$ ) were supplied by Beike Nanomedicine Technology Co., Ltd.  $\text{N}_2$  (99.99%), and  $\text{NH}_3$  (99.999%) were supplied by Nanjing Tianze Gas Center.

## Characterization

The specific surface areas, pore volumes, and pore sizes were determined by analyzing nitrogen ( $\text{N}_2$ ) adsorption-desorption isotherms using the Brunauer-Emmett-Teller (BET) method. Surface area was determined by BET multi-point method. Average pore width was determined by the BJH desorption. Pore volume was determined at  $P/P_0 = 0.99$ . Crystallinity and particle size were obtained by Powder X-ray diffraction (XRD) using a Bruker D8 diffractometer with  $\text{Cu K}\alpha$  radiation ( $\lambda = 1.5406 \text{ \AA}$ ). Morphological characteristics of the catalyst surface were examined through scanning electron microscope (SEM JEOL JSM-7800F).

All products were analyzed offline by a Shimadzu 2014C gas chromatograph (GC) equipped with an ZB-5 capillary column ( $30\text{m} \times 0.25\text{mm} \times 0.32\mu\text{m}$ ) and a flame

ionization detector (FID). The GC temperature program was from 50°C to 280°C with 10°C/min heating rate. Composition of effluents was identified offline by a QP2010 gas chromatography-mass spectrometry (GC-MS) equipped with an InertCap 17MS capillary column (30m×0.25mm×0.25um). The GC-MS temperature program was set to rise steadily from 50°C to 280°C in 23 minutes. All tests were repeated by three times.

### Theoretical calculation

Theoretical calculation was performed by Gaussian 09 program. Structures were optimized using the B3LYP method, grounded in Density Functional Theory (DFT). Stationary points were differentiated into minima or transition states (TS) through the Hessian matrix diagonalization and vibrational normal modes inspection. The distinctive features of the TSs were identified by exploring the motions defined by the eigenvector associated with the imaginary frequency.

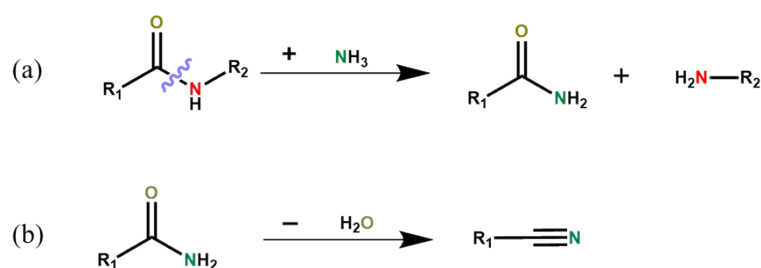

**Scheme S1.** (a) Ammoniation of amide and (b) amide dehydration to nitrile

**Table S1:** Comparison between the main industrial HMDA route (BD hydrocyanation) and this work (CTH process)

| Factor: index                                         | BD hydrocyanation                                                                                                                                        |                               | CTH process                                                                                                                    |                                  |
|-------------------------------------------------------|----------------------------------------------------------------------------------------------------------------------------------------------------------|-------------------------------|--------------------------------------------------------------------------------------------------------------------------------|----------------------------------|
|                                                       | BD                                                                                                                                                       | HCN                           | CPL                                                                                                                            | NH <sub>3</sub>                  |
| Ecotoxicity:<br>LC <sub>50</sub> (rat,<br>inhalation) | 129042 ppm<br>for 4h                                                                                                                                     | 524 ppm for 1h                | 1860 ppm for<br>4h                                                                                                             | 2000 ppm for<br>4h               |
| Human toxicity:<br>LD <sub>50</sub> (rat, oral)       | 5480 mg/kg                                                                                                                                               | 1.52 mg/kg                    | 1210 mg/kg                                                                                                                     | 350 mg/kg                        |
| IDLH                                                  | 2000 ppm                                                                                                                                                 | 50 ppm                        | -                                                                                                                              | 300 ppm                          |
| Bio-<br>accumulation:<br>logK <sub>ow</sub>           | Moderate risk<br>(1.99)                                                                                                                                  | Low risk (0.66)               | Low risk (-0.29)                                                                                                               | No risk (-1.44)                  |
| Eutrophication                                        | No risk                                                                                                                                                  | No risk                       | No risk                                                                                                                        | Medium risk                      |
| Flammability                                          | Highly<br>flammable                                                                                                                                      | Highly flammable              | Not flammable                                                                                                                  | Flammable                        |
| Human<br>carcinogenicity                              | Carcinogenic<br>(Group 1)                                                                                                                                | Not carcinogenic<br>(Group 4) | Not<br>carcinogenic<br>(Group 4)                                                                                               | Not<br>carcinogenic<br>(Group 4) |
| Persistence                                           | Low                                                                                                                                                      | Medium                        | Medium                                                                                                                         | Low                              |
| Process flow                                          | Primary cyanidation, isomerization,<br>secondary cyanidation,<br>hydrogenation                                                                           |                               | Ammoniation, hydrogenation                                                                                                     |                                  |
| Catalytic system                                      | Homogeneous                                                                                                                                              |                               | Heterogeneous                                                                                                                  |                                  |
| Hydrogenation                                         | Two nitrile groups hydrogenation                                                                                                                         |                               | One nitrile group hydrogenation                                                                                                |                                  |
| Energy usage                                          | Moderate energy usage in reaction<br>process (complex process and high<br>energy usage in separation due to<br>substances with similar boiling<br>point) |                               | Moderate energy usage in reaction<br>process (320°C reaction<br>temperature, but relatively low<br>energy usage in separation) |                                  |
| Waste treatment                                       | Waste involving HCN requires<br>careful handling and neutralization                                                                                      |                               | Waste involving water and small<br>amounts of by-products                                                                      |                                  |
| Life cycle                                            | Butadiene is typically derived from<br>petrochemical processes, which have<br>significant environmental footprints.                                      |                               | Caprolactam production from<br>benzene or cyclohexane has<br>associated environmental impacts                                  |                                  |

Reference:

1. Green Chem., 2020,22, 13-15.
2. Registration Dossier - ECHA (europa.eu)
3. TOXICOLOGICAL PROFILE FOR CYANIDE (cdc.gov)
4. Stanford Environmental Health & Safety

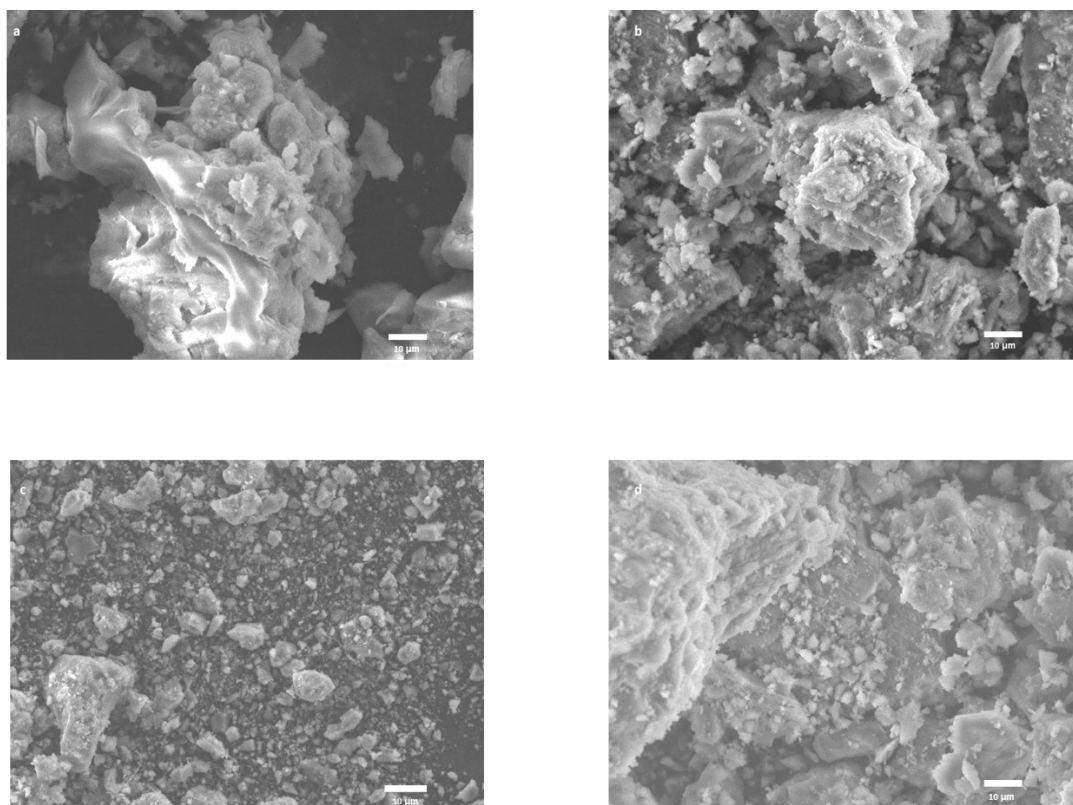

**Fig. S1** (a) SEM images of Meso-Al<sub>2</sub>O<sub>3</sub>(0). (b) SEM images of Meso-Al<sub>2</sub>O<sub>3</sub>(7). (c) SEM images of Meso-Al<sub>2</sub>O<sub>3</sub>(14). (d) SEM images of Meso-Al<sub>2</sub>O<sub>3</sub>(21)

**Table S2.** Stability test for CPL

| Entry | Carrier gas    | Catalyst                       | CPL Conversion (%) | ACN Selectivity (%) |
|-------|----------------|--------------------------------|--------------------|---------------------|
| 1     | N <sub>2</sub> | Blank                          | 0                  | -                   |
| 2     | N <sub>2</sub> | Al <sub>2</sub> O <sub>3</sub> | 0                  | -                   |

Reaction conditions: 4g catalyst loading; 320°C reaction temperature; NH<sub>3</sub>/CPL molar ratio=30; 25wt.% CPL in toluene; WHSV=0.8h<sup>-1</sup>; atmospheric reaction pressure

**Table S3.** Influence of water content on catalytic performance of CPL ammoniation

| Entry | Water content (wt. %) | CPL Conversion (%) | ACN Selectivity (%) |
|-------|-----------------------|--------------------|---------------------|
| 1     | 0                     | 57.8               | 98.3                |
| 2     | 1                     | 53.4               | 98.0                |
| 3     | 2                     | 49.9               | 98.1                |
| 4     | 3                     | 47.5               | 97.9                |
| 5     | 4                     | 45.4               | 98.2                |

Reaction conditions: 4g catalyst loading; 320°C reaction temperature; NH<sub>3</sub>/CPL molar

ratio=30; 25wt.% CPL in toluene; WHSV=0.8h<sup>-1</sup>; atmospheric reaction pressure

### Cartesians coordinates of the optimized structures

CPL

|   |   |           |           |           |
|---|---|-----------|-----------|-----------|
| 6 | 0 | -0.628157 | -1.170179 | -0.571504 |
| 6 | 0 | 0.609235  | -1.572162 | 0.257194  |
| 6 | 0 | 1.859228  | -0.714643 | 0.016261  |
| 6 | 0 | 1.722182  | 0.770422  | 0.374010  |
| 6 | 0 | 0.628996  | 1.511791  | -0.407429 |
| 7 | 0 | -0.735263 | 1.220982  | 0.027731  |
| 6 | 0 | -1.396901 | 0.024497  | -0.021671 |
| 8 | 0 | -2.550144 | -0.075435 | 0.373392  |
| 1 | 0 | -1.347260 | -1.988744 | -0.595392 |
| 1 | 0 | -0.328388 | -0.967800 | -1.607684 |
| 1 | 0 | 0.855574  | -2.609740 | 0.010941  |
| 1 | 0 | 0.347463  | -1.565932 | 1.321627  |
| 1 | 0 | 2.143214  | -0.797007 | -1.041434 |
| 1 | 0 | 2.692052  | -1.138603 | 0.587356  |
| 1 | 0 | 2.677385  | 1.267804  | 0.170584  |
| 1 | 0 | 1.526960  | 0.887257  | 1.446159  |
| 1 | 0 | 0.737053  | 1.307202  | -1.480488 |
| 1 | 0 | 0.763207  | 2.588267  | -0.284595 |
| 1 | 0 | -1.286761 | 1.975543  | 0.410506  |

Cat

|    |   |           |           |           |
|----|---|-----------|-----------|-----------|
| 13 | 0 | -2.445481 | -1.085468 | 1.493942  |
| 13 | 0 | 0.385918  | -0.524827 | 1.216980  |
| 8  | 0 | -2.514777 | -2.552725 | 0.561210  |
| 8  | 0 | -3.510011 | 0.170255  | 1.046342  |
| 13 | 0 | -3.432668 | 1.145728  | -0.357617 |
| 13 | 0 | 1.278977  | 2.609118  | 0.603894  |
| 8  | 0 | 0.294297  | 1.160732  | 0.453170  |
| 8  | 0 | -0.940879 | -0.832503 | 2.279176  |
| 8  | 0 | -2.041194 | 0.973749  | -1.343227 |
| 13 | 0 | -1.277528 | -2.608867 | -0.604111 |
| 13 | 0 | 3.431700  | -1.146263 | 0.358064  |
| 8  | 0 | 2.040627  | -0.974527 | 1.344295  |
| 8  | 0 | -0.293494 | -1.160217 | -0.453172 |
| 8  | 0 | 0.939884  | 0.833822  | -2.279511 |
| 13 | 0 | -0.386031 | 0.525602  | -1.216265 |
| 13 | 0 | 2.445074  | 1.084705  | -1.494700 |
| 8  | 0 | 2.516049  | 2.551689  | -0.561532 |
| 8  | 0 | 3.507962  | -0.172379 | -1.047073 |
| 8  | 0 | 0.883722  | 3.746602  | 1.793061  |

|   |   |           |           |           |
|---|---|-----------|-----------|-----------|
| 8 | 0 | -4.713347 | 2.206799  | -0.734763 |
| 8 | 0 | 4.713793  | -2.205394 | 0.735698  |
| 8 | 0 | -0.882764 | -3.745891 | -1.794132 |
| 1 | 0 | 1.338004  | 4.563846  | 1.997859  |
| 1 | 0 | -4.733042 | 2.770312  | -1.508496 |
| 1 | 0 | 4.735132  | -2.768140 | 1.509927  |
| 1 | 0 | -1.338531 | -4.562576 | -1.998056 |

Rea

|    |   |           |           |           |
|----|---|-----------|-----------|-----------|
| 13 | 0 | -1.445796 | -1.573079 | -1.641810 |
| 13 | 0 | 0.530629  | -0.463633 | 0.166851  |
| 8  | 0 | -0.617429 | -0.984231 | -3.118558 |
| 8  | 0 | -2.990463 | -2.248268 | -1.281444 |
| 13 | 0 | -3.911539 | -1.716054 | 0.056848  |
| 13 | 0 | 0.112890  | 1.403267  | 2.743644  |
| 8  | 0 | -0.462382 | 0.492140  | 1.360849  |
| 8  | 0 | -0.167933 | -1.892704 | -0.446912 |
| 8  | 0 | -3.413984 | -0.279347 | 0.864748  |
| 13 | 0 | -0.279945 | 0.532941  | -2.389822 |
| 13 | 0 | 1.348667  | 2.527972  | -1.388500 |
| 8  | 0 | 1.074856  | 0.730002  | -1.089421 |
| 8  | 0 | -1.586651 | 0.350921  | -1.179204 |
| 8  | 0 | -2.233710 | 2.587400  | 0.618762  |
| 13 | 0 | -2.211224 | 0.862268  | 0.404457  |
| 13 | 0 | -0.710564 | 3.295772  | 0.910618  |
| 8  | 0 | -0.151741 | 3.062195  | 2.553727  |
| 8  | 0 | 0.471391  | 3.523822  | -0.290465 |
| 8  | 0 | 1.199444  | 0.507418  | 3.711807  |
| 8  | 0 | -5.295740 | -2.583741 | 0.573662  |
| 8  | 0 | 2.951483  | 3.009892  | -1.782380 |
| 8  | 0 | 0.255976  | 2.176010  | -2.924796 |
| 6  | 0 | 1.862291  | -2.619153 | 1.520085  |
| 8  | 0 | 1.298232  | -2.935665 | 2.528539  |
| 6  | 0 | 2.381890  | -3.622603 | 0.515491  |
| 6  | 0 | 2.848639  | -3.185362 | -0.875423 |
| 6  | 0 | 4.132942  | -2.348243 | -0.901227 |
| 6  | 0 | 3.955382  | -0.900216 | -0.436308 |
| 6  | 0 | 3.494855  | -0.720216 | 1.005832  |
| 7  | 0 | 2.073982  | -1.152657 | 1.310316  |
| 1  | 0 | 1.631838  | 0.785999  | 4.520412  |
| 1  | 0 | -5.834311 | -2.289624 | 1.308909  |
| 1  | 0 | 3.505880  | 2.596170  | -2.442766 |
| 1  | 0 | -0.124797 | 2.799915  | -3.546364 |
| 1  | 0 | 3.189749  | -4.153578 | 1.037864  |

|   |   |          |           |           |
|---|---|----------|-----------|-----------|
| 1 | 0 | 1.565797 | -4.343248 | 0.426845  |
| 1 | 0 | 2.031035 | -2.667991 | -1.384145 |
| 1 | 0 | 3.022906 | -4.104609 | -1.442529 |
| 1 | 0 | 4.517988 | -2.327558 | -1.925297 |
| 1 | 0 | 4.906313 | -2.839778 | -0.295789 |
| 1 | 0 | 4.913917 | -0.375877 | -0.516147 |
| 1 | 0 | 3.262858 | -0.375202 | -1.099451 |
| 1 | 0 | 3.535247 | 0.338744  | 1.269390  |
| 1 | 0 | 4.159118 | -1.249435 | 1.697093  |
| 1 | 0 | 1.861284 | -0.780226 | 2.248026  |

TS1

|    |   |           |           |           |
|----|---|-----------|-----------|-----------|
| 13 | 0 | 1.472041  | 1.305571  | -1.584223 |
| 13 | 0 | -0.542138 | 0.424234  | 0.480553  |
| 8  | 0 | 0.249423  | 1.324612  | -2.881213 |
| 8  | 0 | 3.167602  | 1.482936  | -1.397710 |
| 13 | 0 | 4.075385  | 0.449103  | -0.373675 |
| 13 | 0 | -0.056441 | -1.908182 | 2.666309  |
| 8  | 0 | 0.371873  | -0.938009 | 1.254369  |
| 8  | 0 | 0.510644  | 1.721654  | -0.091072 |
| 8  | 0 | 3.275464  | -0.934611 | 0.258336  |
| 13 | 0 | -0.434542 | -0.162544 | -2.341927 |
| 13 | 0 | -2.446058 | -1.786803 | -1.350693 |
| 8  | 0 | -1.562952 | -0.243421 | -0.851076 |
| 8  | 0 | 1.046810  | -0.565425 | -1.401970 |
| 8  | 0 | 1.190207  | -3.224077 | -0.138142 |
| 13 | 0 | 1.712454  | -1.570570 | -0.082068 |
| 13 | 0 | -0.416525 | -3.483927 | 0.393115  |
| 8  | 0 | -0.578490 | -3.430824 | 2.129903  |
| 8  | 0 | -1.773967 | -3.169150 | -0.581257 |
| 8  | 0 | -0.083159 | -1.118655 | 4.167024  |
| 8  | 0 | 5.717018  | 0.788107  | -0.035691 |
| 8  | 0 | -4.147934 | -1.709997 | -1.546727 |
| 8  | 0 | -1.498774 | -1.458176 | -2.999551 |
| 6  | 0 | 0.140013  | 2.860272  | 1.233338  |
| 8  | 0 | 0.992982  | 2.873188  | 2.060081  |
| 6  | 0 | -0.480877 | 4.053678  | 0.544917  |
| 6  | 0 | -1.593980 | 3.877983  | -0.493607 |
| 6  | 0 | -3.020240 | 3.732771  | 0.058168  |
| 6  | 0 | -3.376508 | 2.402653  | 0.736102  |
| 6  | 0 | -2.604609 | 2.079066  | 2.014692  |
| 7  | 0 | -1.214906 | 1.620224  | 1.784007  |
| 1  | 0 | -0.296898 | -1.494145 | 5.021574  |
| 1  | 0 | 6.256640  | 0.230998  | 0.525875  |



|      |   |           |           |           |
|------|---|-----------|-----------|-----------|
| 1    | 0 | -4.639903 | -0.998503 | -1.953863 |
| 1    | 0 | -1.451589 | -2.004368 | -3.786854 |
| 1    | 0 | -0.803577 | 4.722785  | 1.351107  |
| 1    | 0 | 0.382310  | 4.540751  | 0.079006  |
| 1    | 0 | -1.345863 | 3.054271  | -1.166953 |
| 1    | 0 | -1.579080 | 4.778800  | -1.115458 |
| 1    | 0 | -3.717488 | 3.877975  | -0.773872 |
| 1    | 0 | -3.217619 | 4.553782  | 0.760165  |
| 1    | 0 | -4.439182 | 2.430586  | 1.000155  |
| 1    | 0 | -3.264002 | 1.576253  | 0.024997  |
| 1    | 0 | -3.138530 | 1.294199  | 2.563054  |
| 1    | 0 | -2.585113 | 2.958402  | 2.670419  |
| 1    | 0 | -0.786821 | 1.443418  | 2.692433  |
| Intl |   |           |           |           |
| 13   | 0 | -2.559489 | -1.285249 | -0.018340 |
| 13   | 0 | 0.783082  | -0.155508 | 0.947364  |
| 8    | 0 | -1.623356 | -2.736064 | -0.322779 |
| 8    | 0 | -2.544844 | -0.142221 | -1.322164 |
| 13   | 0 | -1.772181 | 0.480941  | -2.696060 |
| 13   | 0 | 2.003618  | 2.716994  | -0.053479 |
| 8    | 0 | 1.074475  | 1.232441  | -0.219730 |
| 8    | 0 | -1.150186 | -0.434934 | 1.173964  |
| 8    | 0 | -0.071126 | 0.337063  | -2.839218 |
| 13   | 0 | -0.019519 | -2.771152 | -0.833560 |
| 13   | 0 | 3.827185  | -1.052014 | 1.661699  |
| 8    | 0 | 2.160189  | -0.708823 | 1.823017  |
| 8    | 0 | 0.821590  | -1.255654 | -0.582880 |
| 8    | 0 | 2.933798  | 0.213951  | -2.084092 |
| 13   | 0 | 1.239658  | 0.095510  | -1.761190 |
| 13   | 0 | 3.938414  | 0.734513  | -0.797778 |
| 8    | 0 | 3.648512  | 2.384999  | -0.328989 |
| 8    | 0 | 4.639046  | -0.321520 | 0.343114  |
| 8    | 0 | 1.182292  | 4.158088  | 0.295522  |
| 8    | 0 | -2.696594 | 1.261235  | -3.908441 |
| 8    | 0 | 4.688387  | -2.037418 | 2.756894  |
| 8    | 0 | 0.900187  | -4.016993 | -1.535455 |
| 1    | 0 | 1.569600  | 5.026897  | 0.404219  |
| 1    | 0 | -2.303069 | 1.634031  | -4.698132 |
| 1    | 0 | 4.296188  | -2.459428 | 3.521302  |
| 1    | 0 | 0.582524  | -4.888624 | -1.771967 |
| 6    | 0 | -1.215947 | 0.499371  | 2.106308  |
| 8    | 0 | -0.100272 | 0.979952  | 2.389392  |
| 6    | 0 | -2.528634 | 0.910588  | 2.660763  |

|   |   |           |           |           |
|---|---|-----------|-----------|-----------|
| 6 | 0 | -3.261051 | 1.852911  | 1.654553  |
| 6 | 0 | -4.793711 | 1.693805  | 1.640808  |
| 6 | 0 | -5.366856 | 0.637981  | 0.671159  |
| 6 | 0 | -5.324060 | -0.838020 | 1.088166  |
| 7 | 0 | -3.995062 | -1.458421 | 1.066739  |
| 1 | 0 | -3.118045 | -0.000007 | 2.789319  |
| 1 | 0 | -2.370342 | 1.406671  | 3.618090  |
| 1 | 0 | -2.890380 | 1.683323  | 0.639734  |
| 1 | 0 | -2.992027 | 2.880849  | 1.909281  |
| 1 | 0 | -5.212122 | 2.661456  | 1.344015  |
| 1 | 0 | -5.161784 | 1.509840  | 2.658186  |
| 1 | 0 | -6.425130 | 0.880699  | 0.521366  |
| 1 | 0 | -4.890222 | 0.751601  | -0.309166 |
| 1 | 0 | -6.019640 | -1.375650 | 0.425926  |
| 1 | 0 | -5.749275 | -0.919173 | 2.099876  |
| 1 | 0 | -4.036051 | -2.368609 | 1.512469  |

TS2

|    |   |           |           |           |
|----|---|-----------|-----------|-----------|
| 13 | 0 | 2.436745  | -0.875708 | 0.948498  |
| 13 | 0 | -0.747029 | -0.673079 | -0.625596 |
| 8  | 0 | 1.526066  | -1.849099 | 2.101654  |
| 8  | 0 | 2.517391  | 0.801652  | 1.392335  |
| 13 | 0 | 1.734553  | 2.238213  | 1.837005  |
| 13 | 0 | -2.076333 | 2.069592  | -1.852877 |
| 8  | 0 | -1.130462 | 1.129414  | -0.713064 |
| 8  | 0 | 1.165229  | -0.910059 | -0.482887 |
| 8  | 0 | 0.026705  | 2.319121  | 1.818242  |
| 13 | 0 | -0.060624 | -1.409605 | 2.486709  |
| 13 | 0 | -3.779118 | -1.866314 | -0.350332 |
| 8  | 0 | -2.123667 | -1.734788 | -0.738966 |
| 8  | 0 | -0.817252 | -0.396527 | 1.285335  |
| 8  | 0 | -2.955576 | 1.685845  | 1.360125  |
| 13 | 0 | -1.260878 | 1.373180  | 1.189263  |
| 13 | 0 | -3.958852 | 1.141256  | 0.083905  |
| 8  | 0 | -3.718426 | 2.005921  | -1.407702 |
| 8  | 0 | -4.627244 | -0.427122 | 0.022424  |
| 8  | 0 | -1.296464 | 2.878800  | -3.125109 |
| 8  | 0 | 2.676897  | 3.599651  | 2.284249  |
| 8  | 0 | -4.618870 | -3.356695 | -0.356728 |
| 8  | 0 | -1.012877 | -1.832367 | 3.833983  |
| 6  | 0 | 1.271196  | -1.156184 | -1.839852 |
| 8  | 0 | 0.081637  | -1.009025 | -2.341324 |
| 6  | 0 | 2.494771  | -0.633850 | -2.586998 |
| 6  | 0 | 2.970905  | 0.776529  | -2.166521 |

|   |   |           |           |           |
|---|---|-----------|-----------|-----------|
| 6 | 0 | 4.499974  | 0.853567  | -1.990706 |
| 6 | 0 | 5.104594  | 0.292968  | -0.683970 |
| 6 | 0 | 5.087157  | -1.226740 | -0.412578 |
| 7 | 0 | 3.838189  | -1.782755 | 0.161377  |
| 1 | 0 | -1.720627 | 3.418771  | -3.792394 |
| 1 | 0 | 2.276665  | 4.430602  | 2.543224  |
| 1 | 0 | -4.212420 | -4.194959 | -0.575315 |
| 1 | 0 | -0.717183 | -2.339078 | 4.590494  |
| 1 | 0 | 3.321845  | -1.326047 | -2.436928 |
| 1 | 0 | 2.235194  | -0.659487 | -3.647904 |
| 1 | 0 | 2.489214  | 1.080494  | -1.235070 |
| 1 | 0 | 2.655060  | 1.501079  | -2.920779 |
| 1 | 0 | 4.787050  | 1.909582  | -2.037795 |
| 1 | 0 | 4.986167  | 0.376807  | -2.852828 |
| 1 | 0 | 6.161645  | 0.582690  | -0.695053 |
| 1 | 0 | 4.660467  | 0.810587  | 0.171838  |
| 1 | 0 | 5.914592  | -1.426076 | 0.279054  |
| 1 | 0 | 5.348909  | -1.753085 | -1.345157 |
| 1 | 0 | 4.077734  | -2.609904 | 0.700271  |
| 7 | 0 | 1.674296  | -2.906225 | -1.769374 |
| 1 | 0 | 0.898521  | -3.408071 | -1.342771 |
| 1 | 0 | 1.873839  | -3.303583 | -2.683869 |
| 1 | 0 | 2.509635  | -2.910921 | -1.155293 |

AHA

|    |   |           |           |           |
|----|---|-----------|-----------|-----------|
| 13 | 0 | 2.048014  | 1.255113  | 0.695036  |
| 13 | 0 | -0.259708 | -0.736234 | -0.077471 |
| 8  | 0 | 1.524961  | 1.637193  | 2.330146  |
| 8  | 0 | 2.150418  | 2.581685  | -0.421810 |
| 13 | 0 | 0.917532  | 3.502079  | -1.157840 |
| 13 | 0 | -2.461741 | -0.644022 | -2.396379 |
| 8  | 0 | -1.306016 | 0.165443  | -1.372360 |
| 8  | 0 | 1.410171  | -0.248148 | 0.122119  |
| 8  | 0 | -0.714378 | 3.058081  | -0.938897 |
| 13 | 0 | -0.120680 | 1.267845  | 2.542565  |
| 13 | 0 | -2.784346 | -1.849161 | 1.660900  |
| 8  | 0 | -1.304175 | -1.842998 | 0.805472  |
| 8  | 0 | -0.906320 | 0.912152  | 1.039784  |
| 8  | 0 | -3.405739 | 1.739916  | -0.218292 |
| 13 | 0 | -1.672264 | 1.747069  | -0.362816 |
| 13 | 0 | -4.080572 | 0.171127  | -0.242679 |
| 8  | 0 | -4.059665 | -0.540392 | -1.838991 |
| 8  | 0 | -4.095847 | -0.911661 | 1.073345  |
| 8  | 0 | -1.801198 | -1.626327 | -3.634707 |

|   |   |           |           |           |
|---|---|-----------|-----------|-----------|
| 8 | 0 | 1.360837  | 4.850683  | -2.122672 |
| 8 | 0 | -3.059013 | -2.872253 | 3.007373  |
| 8 | 0 | -1.039377 | 1.126055  | 3.971196  |
| 1 | 0 | -2.321343 | -2.120017 | -4.270925 |
| 1 | 0 | 0.704826  | 5.406554  | -2.544882 |
| 1 | 0 | -2.365553 | -3.398540 | 3.405642  |
| 1 | 0 | -0.722643 | 1.265258  | 4.863610  |
| 6 | 0 | 4.467248  | -0.510022 | 0.749126  |
| 8 | 0 | 4.564535  | -1.254712 | 1.683511  |
| 6 | 0 | 4.751072  | -0.843443 | -0.697818 |
| 6 | 0 | 4.795187  | -2.345068 | -1.035326 |
| 7 | 0 | 4.064201  | 0.871436  | 0.978759  |
| 6 | 0 | 3.453263  | -2.941415 | -1.497008 |
| 6 | 0 | 2.414425  | -3.172250 | -0.386145 |
| 6 | 0 | 1.000398  | -3.425203 | -0.916676 |
| 7 | 0 | 0.379506  | -2.182016 | -1.481521 |
| 1 | 0 | 4.033281  | -0.311861 | -1.330233 |
| 1 | 0 | 5.729822  | -0.388983 | -0.907240 |
| 1 | 0 | 5.179588  | -2.895387 | -0.171691 |
| 1 | 0 | 5.522771  | -2.480167 | -1.840580 |
| 1 | 0 | 4.241898  | 1.123182  | 1.951425  |
| 1 | 0 | 4.510780  | 1.538778  | 0.349516  |
| 1 | 0 | 3.653188  | -3.895520 | -1.998090 |
| 1 | 0 | 3.046609  | -2.282096 | -2.275430 |
| 1 | 0 | 2.715625  | -4.040320 | 0.209198  |
| 1 | 0 | 2.376049  | -2.316102 | 0.286868  |
| 1 | 0 | 0.346618  | -3.761742 | -0.110793 |
| 1 | 0 | 1.019627  | -4.204918 | -1.687156 |
| 1 | 0 | -0.325051 | -2.442933 | -2.171697 |
| 1 | 0 | 1.083797  | -1.674071 | -2.013991 |
